# Supplementary material
Source: PubMed Central journal article supplement (PMC3416447)
Supplement: AEM.00626-12_zam999103486so1.pdf [file AEM.00626-12_zam999103486so1.pdf]

A

|          | NIES102 | NIES843 | NIES1067 | NIES298 | NIES87 | PCC7806 |
|----------|---------|---------|----------|---------|--------|---------|
| NIES102  |         | 0.0087  | 0.0193   | 0.0263  | 0.0301 | 0.0305  |
| NIES843  |         |         | 0.0214   | 0.0280  | 0.0287 | 0.0294  |
| NIES1067 |         |         |          | 0.0239  | 0.0294 | 0.0302  |
| NIES298  |         |         |          |         | 0.0280 | 0.0228  |
| NIES87   |         |         |          |         |        | 0.0273  |
| PCC7806  |         |         |          |         |        |         |

B

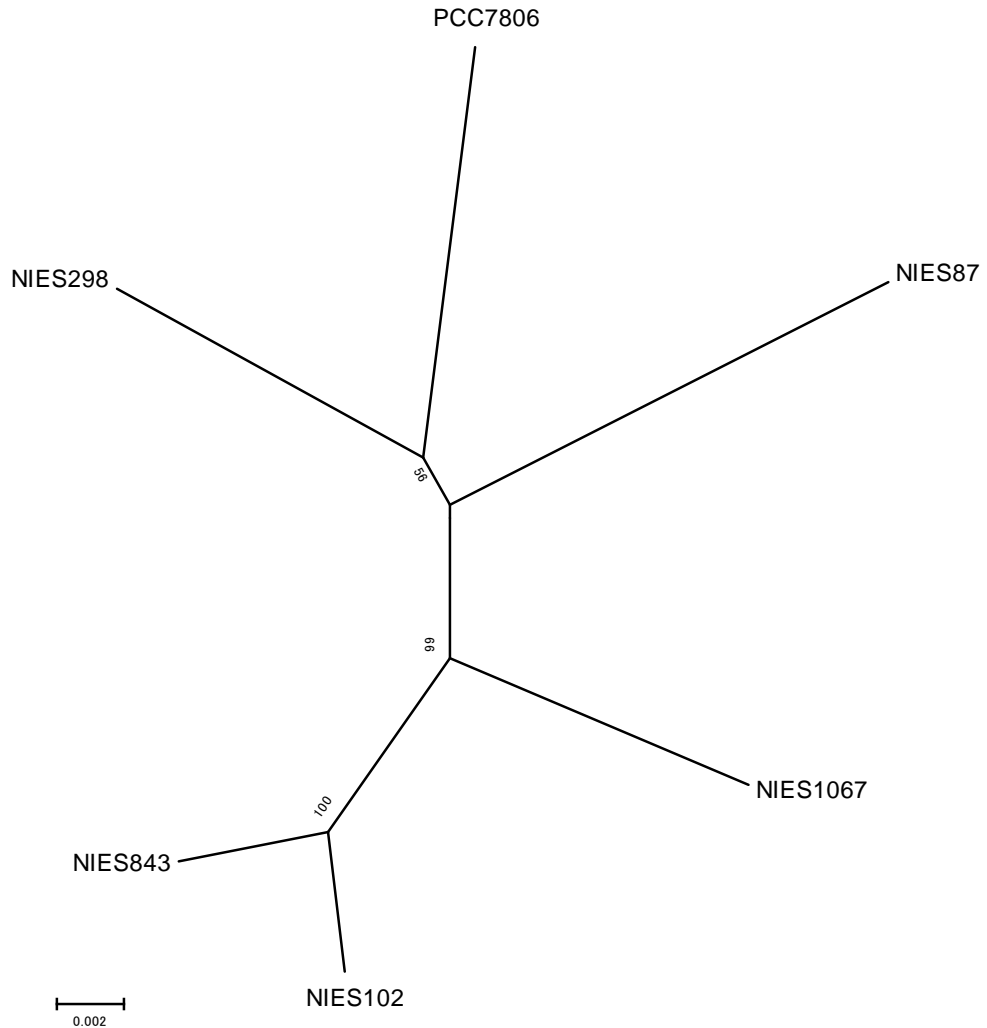

Figure S1. Phylogenetic relationships among six *M. aeruginosa* strains used in this study. Pairwise evolutionary distance (A) and Neighbor-joining tree (B) of the six *M. aeruginosa* strains were calculated using MEGA 5 (1) from concatenated nucleotide sequences (2,992 b) of seven house-keeping genes (*ftsZ*, *glnA*, *gltX*, *gyrB*, *pgi*, *recA*, *tpi*) determined by (2). Sequences of the seven genes in PCC7806 were retrieved from the genomic contigs in the Genbank database.

#### References

- (1) Tamura K, Dudley J, Nei M, and Kumar S. 2007. MEGA4: Molecular Evolutionary Genetics Analysis (MEGA) software version 4.0. *Mol. Biol. Evol.* **24**:1596-1599.
- (2) Tanabe Y, Kasai F, Watanabe M. 2007. Multilocus sequence typing (MLST) reveals high genetic diversity and clonal population structure of the toxic cyanobacterium *Microcystis aeruginosa*. *Microbiology* **153**:3695-3703.

TABLE S1. Primers used in this study

| target strain/CT | primer name                          | sequence (5'-3')                      | purpose                                |
|------------------|--------------------------------------|---------------------------------------|----------------------------------------|
| common           | MaeCRf                               | ATCCTTA ACTATTATCTGGTGGCTGAAAAG       | CRISPR amplification                   |
|                  | MaeCRrGT                             | GGTTTAAGATTAATTGGAACGT                | repeat-based PCR, CRISPR amplification |
|                  | MaeCRrCA                             | GGTTTAAGATTAATTGGAACCA                | repeat-based PCR, CRISPR amplification |
|                  | MaeCRf2                              | CTTATCCCGTAAGGTTTTGC                  | repeat-based PCR                       |
|                  | CRseqMaeF1                           | GCTTTTACCACTGGGCG                     | sequencing                             |
| NIES102          | MaeCRrtp3                            | GACACGAGAAGAAAGAAAAGGTTAATCAGT        | CRISPR amplification                   |
|                  | 102seqF2                             | GATGCTTTATAGGGAGGAGAG                 | sequencing                             |
|                  | 102seqF3                             | TCGATTAATCATCCTAAAGATATCGGGCAGAA      | sequencing                             |
|                  | 102seqR2                             | AGGGGTAATTATGGCTTCTAGAGGGT            | sequencing                             |
|                  | 31120R2                              | AGCCGCCGTCAGTGCCACATCTGAT             | sequencing                             |
|                  | 31110R1                              | TTCTACAATTTGAGTCAATTAAGTACCTATCGG     | sequencing                             |
|                  | MAE_CR_R3                            | TACCATTATTCAGCAAGCCCTAGTTAGTAAAAGTA   | sequencing                             |
| NIES1067         | 1067R1                               | TCGCCGCTTACCGTACTAAAAATATCTTC         | sequencing                             |
|                  | 1067tail1                            | CAGATCAGTTCAATAGATAAAGAAGCAGAGATTAT   | TAIL-PCR                               |
|                  | 1067tail2                            | GCTCAATCCTAGCGCACCGGATCA              | TAIL-PCR                               |
|                  | 1067tail3                            | GAGTGAAGATATTTTTAGTACGGTAAGCGGCGAC    | TAIL-PCR                               |
|                  | 1067iseqF1                           | TTCATTA AATTCTGGGATGATGATAGTAGAATTCTC | sequencing                             |
|                  | 1067iseqR1                           | ACGACAAACAGCATCTTTTTTTAGATATTGATTGG   | sequencing                             |
|                  | 1067tseqF1                           | ACTACTAATCGAGACAATTTAAGTTTTTATACCACT  | sequencing                             |
|                  | 1067tseqR1                           | AATTTAATTCTCTTGCCACAATCAAAATAGT       | sequencing                             |
|                  | 1067tailB1                           | AGGTAACGCCGCCCCAGCCCGTATTTCT          | TAIL-PCR                               |
|                  | 1067tailB2                           | ACAAACTAAACCCTATCGCACCCAAAGCACCAACT   | TAIL-PCR                               |
|                  | 1067tailB3                           | CTAATCCGATAAAGCAAAGCCAGCCGCCCA        | TAIL-PCR                               |
|                  | 1067tailC1                           | GGGTGCGACCATTGGCTGGTAGATGGCT          | TAIL-PCR                               |
|                  | 1067tailC2                           | CCTCTAGTTTTCGCTCGATTTGTAGTTCTC        | TAIL-PCR                               |
|                  | 1067tailC3                           | ATGAAATTTTCTCGGACAAAAAATTAACCCCTAGC   | TAIL-PCR                               |
|                  | 1067tcseqF                           | CTCTATTGACTACTTCTAATTTCTTTT           | sequencing                             |
|                  | 1067tailD1                           | CAAACCTGGAGGAACGGAAGGTAACCTTTT        | TAIL-PCR                               |
|                  | 1067tailD2                           | GGTCTGACAAAAATAGGTGATAAATATCATCAGC    | TAIL-PCR                               |
|                  | 1067tailD3                           | GTTGCGCTGTTAATGTAGTCAGTTTTTCTATTC     | TAIL-PCR                               |
|                  | 1067tailE1                           | GCTATTCCACGGATTCCATGCTGCATTTTTTCTC    | TAIL-PCR                               |
|                  | 1067tailE2                           | TTTAAGCTAAGAGAATTTTCTTCTTCCCCAGT      | TAIL-PCR                               |
| 1067tailE3       | GTTAAGAGATGCAGAAAAGGAATTGGAAAAGAGAAA | TAIL-PCR                              |                                        |

|         |             |                                    |                      |
|---------|-------------|------------------------------------|----------------------|
|         | 1067CRinR1  | TCTCAAGAGGCTCTAAAAGTTGGGGATGCA     | sequencing           |
|         | 1067tailF1  | CCGATAAGTTAGAGGTTCCGGGCGCTTTC      | TAIL-PCR             |
|         | 1067tailF2  | TGCATCCCCAACTTTTAGAGCCTCTTGAGAGGC  | TAIL-PCR             |
|         | 1067tailF3  | CTTTTTCCCTATTAGATTTAGCATTATCGT     | TAIL-PCR             |
|         | 1067fulR    | CCGATTAAGATGGGCGTGGAGTTA           | sequencing           |
|         | 1067tFseqF2 | GGTAAGGGGGTCAGATAAAG               | sequencing           |
|         | 1067seqFN1  | CCTCTAGTAAAATTTATCCAATACCCAA       | sequencing           |
|         | 1067rev2    | AAGGGCAAATTCGCAACTTTTGC            | sequencing           |
|         | 1067rev3    | GCAGGCTTAGATGATAATTTAGATAC         | sequencing           |
| NIES298 | 298CRrS6    | CGCACCTCAAAGATACCGATATTCT          | CRISPR amplification |
|         | 298S6R2     | CTGTGATTGCCGATCGCGTGCT             | sequencing           |
|         | 298tail1    | GGCTTAGACTACGATGGGCCAAGCAT         | TAIL-PCR             |
|         | 298tail2    | TTTTGGGGAGAATTTAGGATGATTTTATTATAAA | TAIL-PCR             |
|         | 298tail3    | AATCATCCTCAATCTTAGCGGCCTCCACAT     | TAIL-PCR             |
|         | 298S3       | TTATAAAAGTACATATCTACAGGATATTCCG    | sequencing           |
|         | 298tseqF1   | TATAGACACAGCTATAGAAGACTATAATCCAATT | sequencing           |
|         | 298tseqR2   | GCAAGCTTCTAAGGATTGCATCCAT          | sequencing           |
|         | 298tailB1   | TTTAGCGGCCTATCAGGCAATTTTCC         | TAIL-PCR             |
|         | 298tailB2   | TATCTTGCCTAGTTCTTTCCCTTACCAGT      | TAIL-PCR             |
|         | 298tailB3   | AGTAAGGAAAGACGACGGTAACGGCAAAG      | TAIL-PCR             |
|         | 298tseq2    | TGAATACTTGCGACTAAATTATTAAG         | sequencing           |
|         | 298tailC1   | GCTGTCTATCTTGCCTAGTTCTTTCCCTT      | TAIL-PCR             |
|         | 298tailC2   | ACTCAGTAGGCGAGGTGACAGCCTGTA        | TAIL-PCR             |
|         | 298tailC3   | ATAGCCGATTAATCGGTCCCGGACTCGAA      | TAIL-PCR             |
|         | 298tailD1   | GGCTGCGGCTGACTTGACAATCGAGCCT       | TAIL-PCR             |
|         | 298tailD2   | GTTAGCAAAGACTGTAACTTATCAGTACACAAG  | TAIL-PCR             |
|         | 298tailD3   | TTGTGAATACTGCAATAGCCACAATAGATAGAAT | TAIL-PCR             |
|         | 298CRinF1   | TGTCGGTGAAAAGGCTTGCT               | sequencing           |
|         | 298CRinR1   | GTCATCTGCCCGGCATCGTT               | sequencing           |
|         | 298tailE1   | CCGATGCCTGATACCCAATGGGCAGGAA       | TAIL-PCR             |
|         | 298tailE2   | CCCCATTGTATCTGGTAATTTTACTATG       | TAIL-PCR             |
|         | 298tailE3   | ATGACCTACCTAGCGCGTATGCAAG          | TAIL-PCR             |
|         | 298tailF1   | GGCCTCATGCCTTTCTCAACGACTGTTGAC     | TAIL-PCR             |
|         | 298tailF2   | AGTGCACCCGCCGTGTATGTGGCGATC        | TAIL-PCR             |
|         | 298tailF3   | TCGCCACCACCCTCTATCTCTCGGCTCA       | TAIL-PCR             |
|         | 298tailG1   | CTTTTGGTAGCCACTGGCAGATTAATCTTC     | TAIL-PCR             |

|        |           |                                     |                                           |
|--------|-----------|-------------------------------------|-------------------------------------------|
|        | 298tailG2 | GGCTTTTTGCCAATTCCCCAAAAGCTTGTC      | TAIL-PCR                                  |
|        | 298tailG3 | CACTATATTCCGATTCACTGGCTAACCG        | TAIL-PCR                                  |
|        | 298tailH1 | CGAGTCTTGATTTTTTCCATCTTGATAATCC     | TAIL-PCR                                  |
|        | 298tailH2 | GGAATCAGAATATGATGGGAAGGCTCGC        | TAIL-PCR                                  |
|        | 298tailH3 | GTGCGTCCCCCTTGAGGGGTTTTCCCTT        | TAIL-PCR                                  |
|        | 298S134F  | CCATTTTCCCATCTGACAATAGTTTTTC        | sequencing                                |
|        | 298S146R  | GAATATCACCGACCAACAATAGATC           | sequencing                                |
|        | 298tail1  | CAAGGAATAATCAAGCAAATGCCCGGCAGA      | TAIL-PCR                                  |
|        | 298tail2  | GCCTGAACGCTGTATTGCAAGCTCACCA        | TAIL-PCR                                  |
|        | 298tail3  | GGTAACAGTAAAGCCTAAAGCTGTA           | TAIL-PCR                                  |
|        | 298tailJ1 | CGCTCTCAAGCTCTTTAGTTCGGTCTTTTAAGCC  | TAIL-PCR                                  |
|        | 298tailJ2 | CTTGAGTGACAGGATATTTTCCAATCGCGAA     | TAIL-PCR                                  |
|        | 298tailJ3 | AACAATAACCATCCTCTCCATCATC           | TAIL-PCR                                  |
|        | 298rev2   | ATCAATTAATGCGCTGGCCAAATTTGGT        | sequencing                                |
|        | 298rev3   | GTATTCCACTGATCCATCGGGATTGAT         | sequencing                                |
|        | 298for3   | CGTTACCTCGGTATTTTCTCG               | sequencing                                |
|        | 298tJseqF | ATTAGCAGCCAACAACGCTC                | sequencing                                |
|        | 298tJseqR | GCAATCCAAAGGATTTATCTTCTTCG          | sequencing                                |
| NIES87 | MaeCRrtp2 | CAATCCGACATATAGTTGATTCTGATAGTT      | CRISPR amplification                      |
|        | 87seqF2   | TGCAAGGGAATATCACACTAAC              | sequencing                                |
|        | 87seqR2   | TTTCCACTTCAATCTAAGAATTGAGA          | sequencing                                |
|        | 87seqR3   | ACTATCCCTTTTTCTGTCAGG               | sequencing                                |
|        | 87seqF3   | TTAGATACTTACGAGAATTTATTACCTTGTTCAAA | sequencing                                |
|        | 87seqR4   | AAAGCCACTGCAGCAGTATGTAGAG           | sequencing                                |
|        | 87wA      | CATTTTGTGCATTTTCCCGTTCTTTAATTGAGT   | CRISPR amplification using outward primer |
|        | 87wAseqF1 | CACATTGGTACAAGCTGGGAAC              | sequencing                                |
|        | 87wAseqR1 | CTTGATCAAAGCGATCACAAATTCC           | sequencing                                |
|        | 87wB1     | TTCAGTGTTTGAGTTGGCGCAG              | CRISPR amplification using outward primer |
|        | 87wBseqR  | GCATTACACCCCGGTTTATAGTT             | sequencing                                |
|        | 87wC      | AACCACCCTACTATTAGGCGAA              | CRISPR amplification using outward primer |
|        | 87tailD1  | TGGTGACTTTTATGAATACAGTTGTACTTATCCC  | TAIL-PCR                                  |
|        | 87tailD2  | TTGAGCCACTAATCCAGAGACA              | TAIL-PCR                                  |
|        | 87wE      | TTTGCCCTAAGTCAGTACCGAT              | CRISPR amplification using outward primer |
| CT1    | CT1R      | TAGGGATAAGGTAAGGCCAA                | sequencing                                |
| CT4    | CT4R      | CCATGATACGCATACTCGAA                | sequencing                                |

|      |        |                           |            |
|------|--------|---------------------------|------------|
|      | CT4F   | TCTGATGATAGTCTGGATGAAATTG | sequencing |
|      | CT4R2  | TTTATTCTTGGCAAGCCTAC      | sequencing |
| CT5  | CT5F   | ATCGTATCGGGATCATCGTG      | sequencing |
|      | CT5R   | AGACCTAAAAATGGCTAAAACAACG | sequencing |
|      | CT5R2  | TGTAAACAGTTATGTAAACAATCG  | sequencing |
| CT12 | CT12F  | TTAACAGCTTGCATTCTCAAGCTAA | sequencing |
|      | CT12R  | TAGCTATGGCATGGATGCAA      | sequencing |
|      | CT12R2 | ATTGGATAGAGGCTTTTGAC      | sequencing |
| CT13 | CT13R  | ATCTTGAGGGTTTCGCCATG      | sequencing |
| CT15 | CT15F  | ACTTTCTACCATCCCAGAAG      | sequencing |
|      | CT15R  | AGGTCTGTAATCCTAAGCAAA     | sequencing |
|      | CT15R2 | TTGAGTGGCTGTGCAAG         | sequencing |
| CT19 | CT19R  | GATACCATTGCTTATCACTAAGA   | sequencing |
| CT20 | CT20R  | CATCCCAGAATTTAATGAAGAC    | sequencing |
| CT21 | CT21F  | ACCTAACTGTACTCTATGAGT     | sequencing |

TABLE S2. Significant matches of the CRISPR spacers to foreign genetic elements.

| Strain   | Spacer name   | Significant match                          |                     |                        | Identity (%) |
|----------|---------------|--------------------------------------------|---------------------|------------------------|--------------|
|          |               | Foreign genetic elements                   | Locus               | Direction <sup>b</sup> |              |
| NIES87   | 87spc78       | plasmid pMA2                               | IG <sup>a</sup>     |                        | 100          |
|          | 87spc129      | plasmid pMA1                               | IG                  |                        | 85           |
|          | 87spc130      | plasmid pMA1                               | IG                  |                        | 86           |
|          | 87spc138      | plasmid pMA2                               | IG                  |                        | 94           |
|          | 87spc147      | plasmid pMA1                               | IG                  |                        | 86           |
|          | 87spc156      | plasmid pMA2                               | IG                  |                        | 88           |
| NIES102  | 102spc23      | plasmid pMA2                               | IG                  |                        | 82           |
| NIES298  | 298spc3       | plasmid pMA1                               | IG                  |                        | 85           |
|          | 298spc5       | plasmid PMA1                               | ORF2                | +                      | 86           |
|          | 298spc6       | plasmid PMA1                               | ORF2                | +                      | 97           |
|          | 298spc7       | plasmid PMA1                               | IG                  |                        | 100          |
|          | 298spc21      | phage Ma-LMM01                             | IG (ORF39-40)       |                        | 94           |
|          | 298spc47      | plasmid PMA1                               | ORF2                | -                      | 92           |
|          | 298spc54      | plasmid PMA1                               | IG                  |                        | 91           |
|          | 298spc77      | phage Ma-LMM01                             | MAP_037             | -                      | 88           |
|          | 298spc102/122 | phage Ma-LMM01                             | MAP_039             | +                      | 83           |
|          | 298spc124     | phage Ma-LMM01                             | MAP_040             | -                      | 86           |
| NIES843  | 843-1spc92    | plasmid pMA1                               | IG                  |                        | 92           |
|          | 843-1spc96    | plasmid pMA1                               | replication protein | -                      | 100          |
|          | 843-3spc4     | plasmid pMA2                               | IG                  |                        | 97           |
|          | 843-3spc14    | <i>Cyanothece</i> PCC7424 plasmid pP742402 | PCC7424_5473        | -                      | 86           |
|          | 843-3spc17    | <i>S. thermophilus</i> LMD-9 plasmid 1     | IG                  |                        | 82           |
| NIES1067 | 1067spc14     | plasmid pMA1                               | IG                  |                        | 94           |
|          | 1067spc15     | plasmid pMA1                               | replication protein | -                      | 92           |
| PCC7806  | 7806spc34     | phage Ma-LMM01                             | MAP_041             | -                      | 85           |
|          | 7806spc50     | <i>Bacillus coagulans</i> plasmid pMSR0    | ORF-2               | -                      | 82           |
| CT1      | CT1spc8       | plasmid PMA1                               | ORF2                | -                      | 91           |
|          | CT1spc9       | plasmid pMA2                               | ORF3                | +                      | 86           |
|          | CT1spc10      | plasmid PMA1                               | ORF2                | -                      | 94           |
|          | CT1spc11      | plasmid PMA1                               | ORF2                | +                      | 100          |
|          | CT1spc12      | plasmid PMA1                               | IG <sup>a</sup>     |                        | 95           |
| CT5      | CT5spc1       | plasmid pMA1                               | IG                  |                        | 91           |
|          | CT5spc2       | plasmid pMA1                               | Rep                 | +                      | 86           |
|          | CT5spc7/9     | plasmid pMA1                               | IG                  |                        | 91           |
|          | CT5spc8       | plasmid pMA1                               | Rep                 | -                      | 92           |
|          | CT5spc22      | plasmid pMA1                               | IG                  |                        | 97           |
| CT6      | CT6spc2       | phage Ma-LMM01                             | MAP_061             | -                      | 89           |
| CT9      | CT9spc1       | plasmid pMA2                               | IG                  |                        | 85           |
| CT10     | CT10spc1      | plasmid PMA1                               | ORF2                | +                      | 97           |
| CT15     | CT15spc12     | phage Ma-LMM01                             | MAP_025             | -                      | 97           |
|          | CT15spc13     | phage Ma-LMM01                             | MAP_020             | -                      | 97           |
|          | CT15spc14     | phage Ma-LMM01                             | MAP_025             | -                      | 97           |
| CT19     | CT19spc12     | phage Ma-LMM01                             | MAP_163             | +                      | 83           |

<sup>a</sup> IG, intergenic region.

<sup>b</sup> +, sense strand; -, antisense strand. Indicated for only matches to coding regions.



|                         |                                                                                                  |
|-------------------------|--------------------------------------------------------------------------------------------------|
| 102spc23<br>CT19spc9    | CCCTTTAGCCGATTTAATTCCTATGAT TTTGGGATTCTC<br>TCGCAATTGCTATGATCTTTGGGATTATCTTGAT<br>**** * * * * * |
| 298spc123<br>7806spc27  | TATCTGCTAAAAGATTTATAATCTTTATTGGTCTA<br>ATCGGAGGTTTATCTGCTAAAAGATTTATAATCTTTATT<br>*****          |
| 87spc38<br>87spc108#    | GATGATCAATTTAGGCTAATACTGCCAGCTCCTTTTGA<br>GACAATCAGTTTAGGCTAATACTGCCAGCTTCTT<br>** * * * * *     |
| 87spc39<br>87spc40      | GCCCAATTGAGAGATGGCGACACGATTAACCTTCGATT<br>GCCCAATTGAGAGATGGCGACACGATTAACCTT<br>*****             |
| 87spc105<br>CT5spc24    | TGATGATTCCTTCGGCTCGAATTTGGAATCGGCAAAG<br>TGATGATTCCTTTGGGTCCAATTTGGAATCGGCAAAG<br>***** * * * *  |
| 102spc2<br>CT23spc5     | TTCAAACATGATACTAATTTTTGACTTTTGGCCGA<br>TCAAACATGATACTAATTTTT GGCTTTTGGCC<br>* * * * *            |
| 298spc62<br>1067spc69   | AGCTTTAATCCAGCTTCTGCGCTAGATTTTATTAATA<br>TGATCCTGCTTCTGCGCTAGATTTTATTAATAAAT<br>* * * * *        |
| 87spc22<br>843-1spc33#  | ATTTGTTGATTAGGTGCTAAAAACGACCATTAAG<br>CTTTGCGTGTGTTGGTTGATTGGGTGCTAAAAAC<br>** * * * * *         |
| 843-2spc3<br>7806spc45  | GTGATTGAGGTGTAGGTAGTTCGCCCCATCCAACCTG<br>GTGATTGAGGTGTAGGCAGTTCGCCCCATCTAAC<br>***** * * * *     |
| CT5spc20<br>CT13spc3#   | ATTTTTAAGCGCAAAAAACTCGCTATCAACATCACGG<br>GTGATAATTGTTTTGAGAGCAAAAAACTCGTTATC<br>***** * * * * *  |
| 87spc45<br>87spc87      | CGCCAATCAAGATGCCCTATAAAAAGTTGTGTCAG<br>TGCCAATCAAGATGCTCCTATAAAAAGTTGTGTCAGT<br>***** * * * * *  |
| 102spc27<br>1067spc32   | TTCCCTATGTCTGACCGTTGGGCGGGGAGATTTAAT<br>TTGCCCTATGTCTGACCGTTGGGCGGGGAGATTAAG<br>** * * * * *     |
| 298spc45<br>843-1spc7   | AATTTGGAGAATATCGGTATCTTTGAGGGTGCCTG<br>GGAGAATATCGGTATCTCTGAGGGTGCCTGCGGGG<br>***** * * * *      |
| 843-1spc55<br>843-2spc1 | AAGTTCCAATGGTACGAAACAGCCTGGGCAGACC<br>CAGCCCGAATGGTACGAGACAGCCTGGGCAGACCAA<br>** * * * * *       |
| 102spc36<br>CT3spc11#   | TTGTCCCTATTCGGGCGCGTCCCATTAAGCTGT<br>TTAATCCTATTCGGGCGCGTTTCATTAAGCTGT<br>** * * * * *           |
| 87spc20<br>CT19spc17#   | TTACCTTCAATTTTTGCTGTCTTCTGCGCTAAC<br>GTTTTACCTTCAATTTCTTGTGCTTCTGCTGTGCT<br>***** * * * * *      |
| 87spc66<br>87spc67      | GGGCTTCCTTCAAATTCGGGCTCGCTAATTCCC<br>GGGCTTCCTTCAAATTCGGGCTCGCTAATTCCC<br>*****                  |
| 87spc119<br>298spc126   | ATCAATTATCAGCGATTATCAAGTAATTAGGAGTA<br>ATCAGTTACCAGCGATTATCAAGTAATTAGGAGT<br>**** * * * * *      |
| 102spc25<br>7806spc65#  | ATTTTACCCTGTATTTCCAGAAATTAGAAGAAAAAG<br>TTTTATCCTGTATTTCCAGAAATTAGAAGAAAAAG<br>*****             |



|                           |                                                                                                    |
|---------------------------|----------------------------------------------------------------------------------------------------|
| 298spc32<br>843-3spc26    | GGAATATCCTGTAGATATGTACTTTTATAAAGAAA<br>TTCGGAGTATCCTGTAGATATGTACTTTTATAAGG<br>*** ***** *          |
| 298spc75<br>1067spc50     | ATTTGATAGCCGATTAATCGGTCCCGGACTCGAA<br>ATTTGATAGCCGATTAATCACTTCCAGGCTCAA<br>***** * * * * *         |
| 298spc76<br>CT17spc9      | CTAGTATTC AATCTTTTCATATTGGCTACCTAGCT<br>CCAGTATTC AATCTTTTCATATTGGCTATTTAGC<br>* ***** *           |
| 298spc139<br>CT3spc6#     | TCACTCACCCGCTTTACTAGCATATCACACTTTC<br>TTTACTAGCATATCACACTTTC AATCAATGCGATA<br>*****                |
| 102spc38<br>298spc142     | ATCGAAGAGCTACACGCTGAAAAAGAGCGCGATA<br>ATCGAAGAGCTACACGCTGAAAAAGAGCGTGATAT<br>***** *               |
| 87spc129<br>843-1spc24#   | ACTACACGGGACCCAATCCTGAAAGCCTTACCAC<br>AACTATAGATGTCACTACACAGGACCGAATCCTGA<br>***** *               |
| 843-1spc83<br>CT5spc28    | ATTTTAGACATTTT TAGGTCTGTGCCAAGAATGCA<br>CTGT TTTTCGTTGTTT TAGCCATTTT TAGGTCT<br>***** *            |
| 843-1spc107<br>843-2spc10 | ACTAAGTATTTT GCTGGTAAGCAAATAGATGAATT<br>ACCAAGTATTTT GCTGGTAAAGAAACAGACGAATT<br>** ***** * * * * * |
| 843-3spc11<br>843-3spc39  | CATTTACTTTTTAATGAAGGCACGCCATAATTTAA<br>CATTTACTTTTTAATGAAGCCACGCCATAATTTAA<br>***** *              |
| 843-1spc71<br>1067spc2#   | GTTTTTAGGAATGATGCCTGCCGTGGCAATGTCT<br>TAGGAATGATGCCTACCGTGGCACTGTCTCTTGAT<br>***** *               |
| 1067spc60<br>7806spc40    | ACCTCTATGACTACTTCTAATCTTTCCCCACAG<br>AACTATTTCTAATCTTTCCCAATGTTAAACTGG<br>**** ***** *             |
| 843-1spc29<br>1067spc88#  | AATGGTTTG CATAATCCTAATTGCTACATCTCCC<br>TTGCATAATCCTAATTGCTACATCTCCC GAAGTAA<br>***** *             |
| CT3spc9<br>CT5spc32       | AAAGCGAGCCTTTTCTCCACTTTGAAAGTAACTC<br>AAATGTAGCCTTTTCTCCACTTTGAAAGTAACT<br>*** ***** *             |
| 87spc89<br>CT5spc3        | GCATTTCTCCAATGGCATCGCCATCGGCAAAGA<br>TCTCCAATGGCATCGCCATCGGCAAAGCATAAA<br>***** *                  |
| CT10spc5<br>CT12spc14     | GGCATAGAAGCCGATCACTACCCGATCAAGAGGA<br>GGCATAGAAGCTAATCACTACCCTGATCAAACAG<br>***** * * * * *        |
| CT11spc5<br>CT12spc9      | CTAATTCGCGCTTAAATCGCTGTATTCTGATT<br>CTAATTCGCGCTTAAATGCTGTATTCTGATTCA<br>***** *                   |
| CT1spc7<br>CT1spc13#      | ATTTTCGATCTCCTCCCGGCACTCCTCCCGGGCC<br>TTTCGATCTCCTCCCGGCACTCCTCCCGGGCCGA<br>***** *                |

<sup>a</sup> Shared nucleotides are indicated by “\*”. Complementary sequences are shown for the spacers marked with #.

## Supplemental Text. Consensus sequences for the CRISPR types.

>CT1

CTTATCCCGTAAGGTTTTGCGGGGTCTTGAAGAAGCTGGGTCACTTGTGTACAATGGGTTTATTGCGGGTGCGGCGCATACGAACCTT  
GAAAACCCCATAGCGTACGGCTTTTACCCTGGGCG

GTTCCAATTAATCTTAAACCCCTATTAGGGATTGAAAC  
GTTCCAATTAATCTTAAACCCCTATTAGGGATTGAAAC

ATGGCAGTAACCTGTTAACAGGTTTATATCTTCTAC  
TGAGGGGATACATCCCCTCAGTCCTTAGCTCTAAG  
GCTAGTGACATCTATAGTCCTTACTCTTGGATCCT  
GTTGAAGCCATAAGGTAAAAAATACCTCAATAA  
TTTTTAATTATTGCCGATGGAATTGCAGAATTC  
TTTTAATATTGCCGAGCTAATAGATTTTTTAAT  
ATTTTCGATCTCCTCCCGGCACTCCTCCCGGGCC  
ATCTGGTTTCTTATAAATTGCGCCGTCAACTC  
ATCAAGGGGATTTATACCTATGCGATCCAAAAGAAAT  
GAAATTCTCATCTATTTTCAGGATCATAATTTTCGAT  
CCTTTTTTAAACATTAGGGGGAGAATACTT  
CTTACCTTGGCCTTACCTTATCCCTACCCTTGGCCCTGCTT  
TCGGCCCGGAGGAGTGCCGGGAGGAGATCGAAA  
AACAGTCTGTCTCAGTATTGTTTACAGATAACAG  
GTTTTGTGATGAGGTGGATCGCTATCCTTTTTAGTG  
AGAAAAGAAGCAAACCTCAATATTATTAGGCTCAA

>CT2

CTTATCCCGTAAGGTTTTGCGGGGTCTTGAAGAAGCTGGGTCACTTGTGTACAATGGGTTTATTGCGGGTGCGGCGCATACGAACCTT  
GAAAATCCCATAGCGTATAGCTTTTACCCTGGGCG

CTTCCAATTAATCTTAAACCCCTATTAGGGATTGAAAC  
CTTCCAATTAATCTTAAACCCCTATTAGGGATTGAAAC

AAGAAATTGGTAGTTTTAAGATTGGAAAATACCCAAT  
GAGGTAATATCTCAAAGAGATCAATCTCTTTTTT  
TTACGAATTTTCGATTAAATGCGGTATTTCTGTCCG  
CTGAAACTCTTCAAATGAGAGCAATTTCTTTTTTTG  
ATCAGTAGATAAATCTTAAATCGCTTTTTTGATATTG  
GTCAGCACCTGCGCTGCCAGTCCCGTGATAAAACACG  
GCGACCCTTCCCCGAACGAGTACCTTTTCCCCGGG  
TTGCAACATCGATTGCTAAATTTTACCAGTCAGGG  
TTGCAACATCGATTGCTAAATTTTACCAGTCAGGG  
CGAGAATGACTTGCAATCCCTTATTTTTTCTACCG  
CCCTTAGATGAAGCTGTACCACGCACTCCCGGCCCT  
AAGTCTCACTTGATAGCCAATAGCCCGGCCCTCACATCG  
CTTTATATTCTGTGAGAAGATGCCAGTAATAATCCG

>CT4

CTTATCCCGTAAGGTTTTGCGGGGTCTTGAAGAAGCTGGGTCACTTGTGTACAATAGATTTATTGCGGGTGCGGCGCATACGAACCTT  
GAAAACCCCATAGCGTATAGCTTTTACCCTGGGCG

GTTCCAATTAATCTTAAACCCCTATTAGGGATTGAAAC  
GTTCCAATTAATCTTAAACCCCTATTAGGGATTGAAAC

TAGCCTTAGATGATCGATCAAGTAGTTCATCTGTAGT  
TTCATTCTTACGGCGGAAATATGCTCATCCTTTTG  
TATCTGATGATAGTCTGGATGAAATTGTATTAGA  
AGGAAAAGTGATGCGCGTATCCTCGTGCAAAATCGA  
TAGCGTAAAATACAAAATTTTTATTGATTTCTTT  
AAAAATGTGCATTTACTCTTTAACGCTAGCCATAAT  
GGACGCTATTAGTATAGATAAATTTGCAAATGCCCTAGGA  
GTTTTTATTAATTAGCCCTTAGATGTGTTACATATC  
GTAACGCCGTAACGCTGTAACAGCCTTATCCAGTAAGG  
ATAGCTTGATTTTAAATAGAAATTAAGATTGATTA  
GCTGTACCGGGATTAAAAGGCAAATCGACACGCAA  
GACTAGCGCATAATTGATCGCCGCTATCCAATCTT  
GCTACCGTTCTGTGGGGTGGGAATCGTTTTTTGCGT  
TTAGAGGCTCAAAAAGCTCAAACGAAATAGAAAT  
AGAGTCGCTTGCTATTAACCTATGATTCTCGATCTG





GTTCCAATTAATCTTAAACCCTACTAGGGATTGAAAC  
GTTCCAATTAATCTTAAACCCTACTAGGGATTGAAAC  
GTTCCAATTAATCTTAAACCCTACTAGGGATTGAAAC

TATACCGAGAGGGAAGCGATCCGGACAATGCTGCTTAATA  
AGGAGTATCAAAACGTGGAATCAATCGAGTACGA

>CT24

CTTATCCCGTAAGGTTTTGCGGGTCTTGAAGAAGTGGGTCACCTTGCTGTATGATTGGTTTTATTGCGGGTGC GGCGCATACGAACCTT  
GAAAATCCCATAGCGTATAGCTTTTACCCTGGGCG

GTTCCAATTAATCTTAAACCCTACTAGGGATTGAAAC  
GTTCCAATTAATCTTAAACCCTACTAGGGATTGAAAC

AATCACTTTGATGCTATTTTTGCTATCTCTCAT  
AGAGCATATTCGCTATTTCCGTTAAAAAATGCTAGG  
TCGTGAACCCAAATAGTTTGATAGGGTGATTGAGCTT  
TTAAAAATTATAGGGATAAAAGACATGGAAAATAC  
CGATCGCCTTTTGCCGGATCAATTAAGGATAAAA  
GCGATCGCATCCTAGACCATTCCCGCATACTT  
GTTTGTGCCAGTGCATCGGTGTGGTTAGTGCTAGAGC  
AGGATTCATTGTAAGTGCCTATGTGTCGATAGCTTACATG  
CCATGGTTTTATCTTTAGGACTCGCATCAGATAGCCACAGA
